# Supplementary material for: Evaluation of the diagnostic performance of heart-type fatty acid binding protein in the BWH-TIMI ED chest pain study
Source: Springer Nature journal article supplement (doi:10.1007/s11239-013-0870-7), 2013-01-17
Supplement: MOESM1 [file 11239_2013_870_MOESM1_ESM.docx]

Supplemental Table 1: Baseline Characteristics of Patients in Cohort vs. Not in cohort

| **Variable** | **Cohort**  **N=343** | **Not Included**  **N=100** | **p-value** |
| --- | --- | --- | --- |
| Demographics |  |  |  |
| Age ≥ 65 yrs (%) | 36 | 32 | 0.50 |
| Male (%) | 60 | 61 | 0.91 |
| Weight (kg), median (IQR) | 84.1 (73.7, 99.3) | 87.5 (78.0, 106.6) | 0.04 |
| Risk Factors |  |  |  |
| Diabetes mellitus (%) | 29 | 24 | 0.38 |
| Current smoker (%) | 17 | 21 | 0.35 |
| History of hypertension (%) | 66 | 68 | 0.73 |
| History of hypercholesterolemia (%) | 66 | 64 | 0.77 |
| History of MI (%) | 30 | 25 | 0.41 |
| History of PCI (%) | 33 | 38 | 0.31 |
| History of CABG (%) | 15 | 13 | 0.74 |
| History of CHF (%) | 10 | 7 | 0.39 |
| Creatinine clearance < 60 ml/min (%) | 16 | 12 | 0.38 |
| Presentation & Treatment |  |  |  |
| ECG changes at Presentation (%) | 22 | 24 | 0.59 |
| ST Segment Elevation (%) | 6 | 4 | 0.42 |
| Symptom onset to Baseline (hrs) Median (IQR) | 8.8 (5.5, 14.8) | 7.4 (4.9, 12.2) | 0.12 |

CABG: coronary artery bypass graft surgery; CHF: congestive heart failure; ECG: electrocardiogram; hrs: hours; IQR: interquartile range; kg: kilogram; MI: myocardial infarction; min: minute; ml: milliliter; N: number; PCI: percutaneous coronary intervention; yrs: years

Supplemental Table 2: Baseline Performance for Diagnosing Myocardial Infarction excluding STEMI

| **Biomarker** | **Myocardial Infarction** | | | | | | | |
| --- | --- | --- | --- | --- | --- | --- | --- | --- |
| **Sensitivity**  **%**  **(95% CI)** | **Specificity**  **%**  **(95% CI)** | **PPV**  **%**  **(95% CI)** | **NPV**  **%**  **(95% CI)** | **AUC**  **Full Cohort**  **(N=343)** | **P-value*** | **AUC**  **Early Presenters (<=6h)**  **N=94** | **P-value*** |
| Local cTnI | 78  (67-87) | 97  (94-99) | 88  (78-95) | 94  (90-96) | 0.922  (0.88-0.96) | 0.0001 | 0.854  (0.73-0.98) | 0.95 |
| Sensitive cTnI | 92  (84-97) | 92  (88-95) | 77  (67-85) | 98  (95-99) | 0.954  (0.92-0.99) | <0.0001 | 0.999  (0.99-1.00) | 0.005 |
| H-FABP | 60  (49-71) | 79  (73-84) | 47  (37-57) | 87  (81-91) | 0.763  (0.70-0.83) | NA | 0.860  (0.76-0.96) | NA |

AUC: area under curve; CI: confidence interval; h: hours; N: number; NA: not applicable; NPV: negative predictive value; PPV: positive predictive value

*p-value for comparison of H-FABP vs. each cTnI assay

Supplemental Table 3: Baseline Performance of Combination of H-FABP and Troponin for Diagnosing Myocardial Infarction excluding STEMI

| **Biomarker** | **Myocardial Infarction** | | | |  |  |
| --- | --- | --- | --- | --- | --- | --- |
| **Sensitivity**  **%**  **(95% CI)** | **Specificity**  **%**  **(95% CI)** | **PPV**  **%**  **(95% CI)** | **NPV**  **%**  **(95% CI)** | **AUC** | **P-value*** |
| **Full Cohort (N=330)** |  |  |  |  |  |  |
| Local cTnI + H-FABP | 92  (84-97) | 77  (71-82) | 55  (46-64) | 97  (94-99) | 0.876  (0.81-0.94) | 0.002 |
| Sensitive cTnI + H-FABP | 94  (86-98) | 73  (68-79) | 52  (44-61) | 97  (94-99) | 0.961  (0.93-0.99) | 0.15 |
| **<=6 hours from symptom onset (N=94)** |  |  |  |  |  |  |
| Local cTnI + H-FABP | 100  (77-100) | 83  (72-90) | 50  (31-69) | 100  (95-100) | 0.725  (0.49-0.96) | 0.024 |
| Sensitive cTnI + H-FABP | 100  (77-100) | 81  (71-89) | 48  (29-68) | 100  (95-100) | 0.999  (0.99-1.00) | NA† |

CI: confidence interval; PPV: positive predictive value; NPV: negative predictive value

*p-value for comparison of H-FABP + troponin assay vs. troponin assay alone; †Identical AUC values
